# Supplementary material for: Paneth cell α-defensin misfolding correlates with dysbiosis and ileitis in Crohn’s disease model mice
Source: Life Sci Alliance. 2020 Apr 28;3(6):e201900592. doi: 10.26508/lsa.201900592 (PMC7190275; doi:10.26508/lsa.201900592)
Supplement: Supplementary file 1 [file LSA-2019-00592_TableS1.xls]

## Sheet: Sheet1
	Evaluation item	Score	Grade
	[a] Inflammatory infiltration	0	≦ 81 cells
	(The number of inflammatory cells)	1	82–116 cells
		2	117–151 cells
		3	152 cells ≦
	[b] Villus distortion	0	1.5 <
	(Villus length / crypt depth)	1	1.0–1.5
		2	0.5–1.0
		3	< 0.5
	[c] Thickening of muscle layer	0	≦ 45 mｍ
	(Thickness of muscle layer)	1	46–114 mm
		2	115–183 mm
		3	184 mm ≦
	[d] Number of crypt abscesses	0.5 x
		number
